# Supplementary material for: Pan-genomic and transcriptomic analyses of Leuconostoc mesenteroides provide insights into its genomic and metabolic features and roles in kimchi fermentation
Source: PubMed Central journal article supplement (PMC5599536; doi:10.1038/s41598-017-12016-z), 2017-09-14
Supplement: 41598_2017_12016_MOESM1_ESM.pdf [file 41598_2017_12016_MOESM1_ESM.pdf]

## Supplementary Material

### **Pan-genomic and transcriptomic analyses of *Leuconostoc mesenteroides* provide insights into its genomic and metabolic features and roles in kimchi fermentation**

Byung Hee Chun<sup>1,†</sup>, Kyung Hyun Kim<sup>1,†</sup>, Hye Hee Jeon, Se Hee Lee<sup>2,\*</sup>, and Che Ok Jeon<sup>1,\*</sup>

<sup>1</sup>*Department of Life Science, Chung-Ang University, Seoul 06974, Republic of Korea*

<sup>2</sup>*Microbiology and Functionality Research Group, World Institute of Kimchi, Gwangju 61755, Republic of Korea*

\*Corresponding author: Che Ok Jeon ([cojeon@cau.ac.kr](mailto:cojeon@cau.ac.kr)).

\*Co-corresponding author: Se Hee Lee ([leesehee@wikim.re.kr](mailto:leesehee@wikim.re.kr))

†These authors contributed equally to this study.

**Supplementary Fig. S1.** Heat-map based on average nucleotide identity (ANI) values (%) showing relatedness among *Leu. mesenteroides* strains and the type strains of *Leu. suionicum* (strain DSM 20241<sup>T</sup>) and *Leu. pseudomesenteroides* (strain KCTC 3652<sup>T</sup>) in Table 1. Strain names as described in GenBank or validated names are given as row and column labels and the type strains are highlighted in bold. Hierarchical clustering on the top is represented by a dendrogram, constructed by a simple linkage of the ANI values.

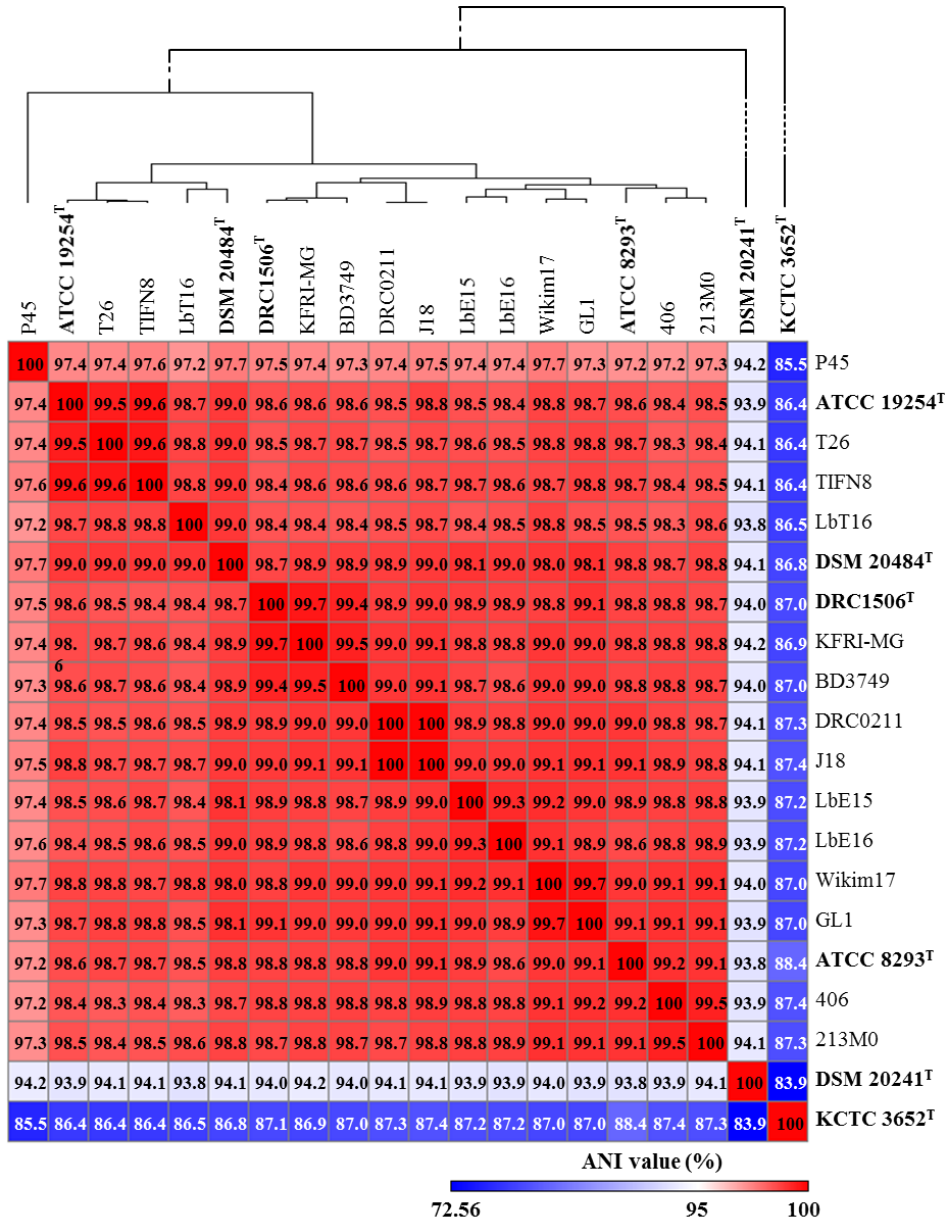



**Supplementary Fig. S3.** Histograms showing the distributions of the core-, accessory-, and unique-genomes in the pan-genome of *Leu. mesenteroides* strains. Genes identified from 15–16 *Leu. mesenteroides* genomes with the increase of gene numbers in the accessory genome were defined as the soft core-genome of *Leu. mesenteroides*.

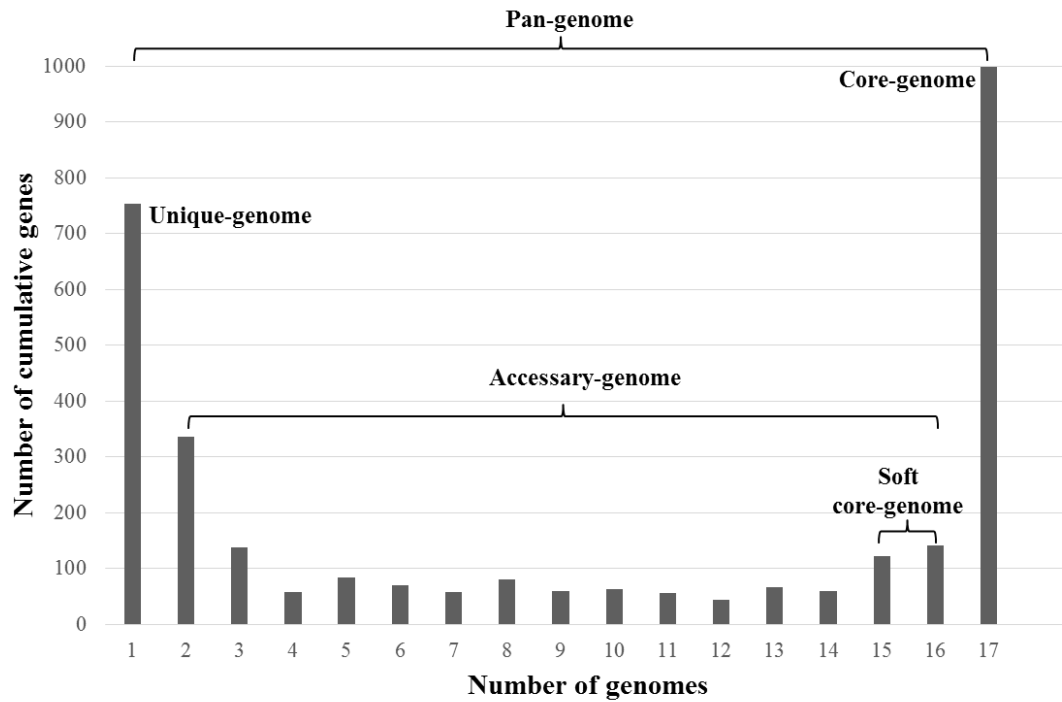

**Supplementary Fig. S4.** Relative abundances of *Leu. mesenteroides* mRNA sequencing reads for total LAB mRNA sequencing reads during the kimchi fermentation.

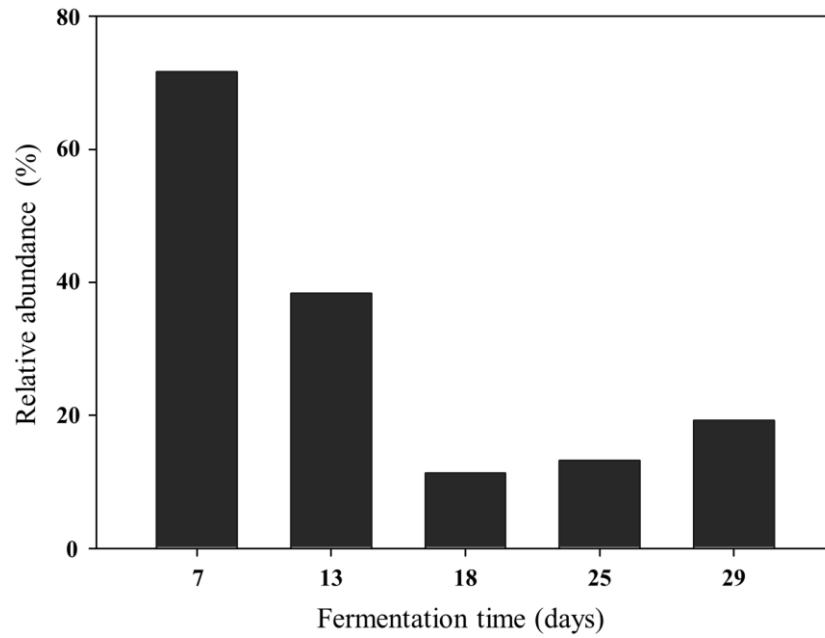

**Supplementary Table S1.** Lists of 999 genes of the core-genome, 1,432 genes of the accessory-genome (present in more than two strains), and 754 genes of the unique genome present in 17 *Leu. mesenteroides* strains, which are indicated in a separate EXCEL file, Supplementary Table S1.

**Supplementary Table S2.** List of *Leu. mesenteroides* genomes deficient for genes encoding proteins constituting the reconstructed fermentative metabolic pathways of *Leu. mesenteroides* strains.

| <b>Protein</b>                                   | <b>E.C number</b> | <b>Genome</b>                                                                                                                                                                        |
|--------------------------------------------------|-------------------|--------------------------------------------------------------------------------------------------------------------------------------------------------------------------------------|
| Fructose-bisphosphate aldolase                   | 4.1.2.13          | DRC1506 <sup>T</sup> , KFRI-MG, Wikim17, 406, GL1, ATCC 8293 <sup>T</sup> , J18, DRC0211, LbE16, DSM 20484 <sup>T</sup> , LbE15, ATCC 19254 <sup>T</sup> , T26, BD3749, 213M0, LbT16 |
| Ribulokinase                                     | 2.7.1.16          | DRC1506 <sup>T</sup> , Wikim17, 406, GL1, LbE16, DSM 20484 <sup>T</sup> , LbE15, ATCC 19254 <sup>T</sup> , LbT16, T26, BD3749, 213M0                                                 |
| L-Arabinose isomerase                            | 5.3.1.4           | DRC1506 <sup>T</sup> , Wikim17, 406, LbE16, DSM 20484 <sup>T</sup> , LbE15, ATCC 19254 <sup>T</sup> , T26, 213M0                                                                     |
| Malate dehydrogenase                             | 1.1.1.37          | DRC1506 <sup>T</sup> , KFRI-MG, Wikim17, 406, GL1, J18, DRC0211, LbE16, LbE15, BD3749                                                                                                |
| Ribulose phosphate epimerase                     | 5.1.3.4           | DRC1506 <sup>T</sup> , Wikim17, 406, DSM 20484 <sup>T</sup> , ATCC 19254 <sup>T</sup> , T26, 213M0                                                                                   |
| PTS cellobiose transporter subunit IIA           | 2.7.1.205         | 406, LbE16, LbE15, ATCC 19254 <sup>T</sup> , LbT16, T26, 213M0                                                                                                                       |
| PTS cellobiose transporter subunit IIB           | 2.7.1.205         | 406, LbE15, ATCC 19254 <sup>T</sup> , LbT16, T26, 213M0                                                                                                                              |
| Glucosyltransferase                              | 2.4.1.5           | Wikim17, GL1, ATCC 19254 <sup>T</sup> , LbT16, T26                                                                                                                                   |
| Fumarate reductase                               | 1.3.5.4           | DRC1506 <sup>T</sup> , Wikim17, GL1, DSM 20484 <sup>T</sup> , ATCC 19254 <sup>T</sup> , T26                                                                                          |
| Xylose isomerase                                 | 5.3.1.5           | KFRI-MG, DSM 20484 <sup>T</sup> , ATCC 19254 <sup>T</sup> , LbT16, T26                                                                                                               |
| Pyruvate oxidase                                 | 1.2.3.3           | P45, ATCC 19254 <sup>T</sup> , LbT16, T26, 213M0                                                                                                                                     |
| Maltose phosphorylase                            | 2.4.1.8           | DSM 20484 <sup>T</sup> , ATCC 19254 <sup>T</sup> , LbT16, T26                                                                                                                        |
| Mannose-6-phosphate isomerase                    | 5.3.1.8           | KFRI-MG, ATCC 19254 <sup>T</sup> , LbT16, T26                                                                                                                                        |
| 6-Phospho-β-glucosidase                          | 3.2.1.86          | LbE16, ATCC 19254 <sup>T</sup> , LbT16, T26                                                                                                                                          |
| Mannitol dehydrogenase                           | 1.1.1.67          | DSM 20484 <sup>T</sup> , ATCC 19254 <sup>T</sup> , T26                                                                                                                               |
| PTS cellobiose transporter subunit IIC           | 2.7.1.205         | ATCC 19254 <sup>T</sup> , LbT16, T26                                                                                                                                                 |
| β-Galactosidase (lacZ)                           | 3.2.1.23          | KFRI-MG, ATCC 19254 <sup>T</sup>                                                                                                                                                     |
| PTS sucrose transporter subunit IIABC            | 2.7.1.211         | ATCC 19254 <sup>T</sup> , T26                                                                                                                                                        |
| Fructokinase                                     | 2.7.1.4           | ATCC 19254 <sup>T</sup> , T26                                                                                                                                                        |
| Pyruvate dehydrogenase                           | 1.2.4.1           | ATCC 19254 <sup>T</sup> , T26                                                                                                                                                        |
| Dihydrolipoyl dehydrogenase                      | 1.8.1.4           | ATCC 19254 <sup>T</sup> , T26                                                                                                                                                        |
| Butanediol dehydrogenase                         | 1.1.1.4           | ATCC 19254 <sup>T</sup> , T26                                                                                                                                                        |
| β-Fructofuranosidase                             | 3.2.1.26          | ATCC 19254 <sup>T</sup> , T26                                                                                                                                                        |
| Sucrose-6-phosphate hydrolase                    |                   |                                                                                                                                                                                      |
| PTS system, trehalose-specific IIB/IIC component | 2.7.1.201         | LbE15, T26                                                                                                                                                                           |
| Galactose-1-phosphate uridylyltransferase        | 2.7.7.12          | KFRI-MG                                                                                                                                                                              |
| Mannose-specific PTS system component IID        | 2.7.1.191         | KFRI-MG                                                                                                                                                                              |
| Sucrose phosphorylase                            | 2.4.1.7           | LbT16                                                                                                                                                                                |
| Xylulokinase                                     | 2.7.1.17          | LbT16                                                                                                                                                                                |
| Triosephosphate isomerase                        | 5.3.1.1           | GL1                                                                                                                                                                                  |
| Enolase                                          | 4.2.1.11          | GL1                                                                                                                                                                                  |

**Supplementary Table S3.** Comparison of dextran production and fermentative metabolic properties of the type strains of four *Leu. mesenteroides* subspecies

Strains; 1. *Leu. mesenteroides* subsp. *mesenteroides* ATCC 8293<sup>T</sup>; 2, *Leu. mesenteroides* ssp. *jonggajibkimchii* DRC1506<sup>T</sup>; 3, *Leu. mesenteroides* subsp. *dextranicum* KACC 12315<sup>T</sup> (=DSM 20484<sup>T</sup>); 4, *Leu. mesenteroides* subsp. *cremoris* KCTC 3529<sup>T</sup> (=ATCC 19254<sup>T</sup>). All strains are positive for acid production (fermentation) from D-glucose, *N*-acetylglucosamine, arbutin, melibiose, sucrose, potassium gluconate, D-raffinose, and turanose. All strains are negative for acid production (fermentation) from glycerol, erythritol, D-arabinose, L-xylose, D-adonitol, methyl- $\beta$ -D-xylopyranoside, L-sorbose, methyl- $\alpha$ -D-mannopyranoside, L-rhamnose, dulcitol, inositol, D-sorbitol, inulin, melezitose, starch, glycogen, xylitol, D-lyxose, D-tagatose, fucose, D-arabitol, and L-arabitol. +, positive; –, negative.

| Characteristic                                                                                                                                                 | 1 | 2 | 3 | 4 |
|----------------------------------------------------------------------------------------------------------------------------------------------------------------|---|---|---|---|
| Dextran production                                                                                                                                             | + | + | + | – |
| Fermentation (acid production) of:                                                                                                                             |   |   |   |   |
| Amygdalin, L-arabinose, aesculin, D-fructose, D-mannose, D-lactose, maltose, methyl-D-glucopyranoside, salicin, trehalose, D-xylose, potassium 5-ketogluconate | + | + | + | – |
| Cellobiose, gentiobiose                                                                                                                                        | + | – | + | – |
| Galactose                                                                                                                                                      | + | + | – | + |
| Potassium 2-ketogluconate                                                                                                                                      | – | + | – | + |
| Mannitol, D-ribose                                                                                                                                             | + | + | – | – |
